# Supplementary material for: Identification of serum exosomal metabolomic and proteomic profiles for remote ischemic preconditioning
Source: Springer Nature journal article supplement (doi:10.1186/s12967-023-04070-1), 2023-04-03
Supplement: MOESM1 [file 25203016]

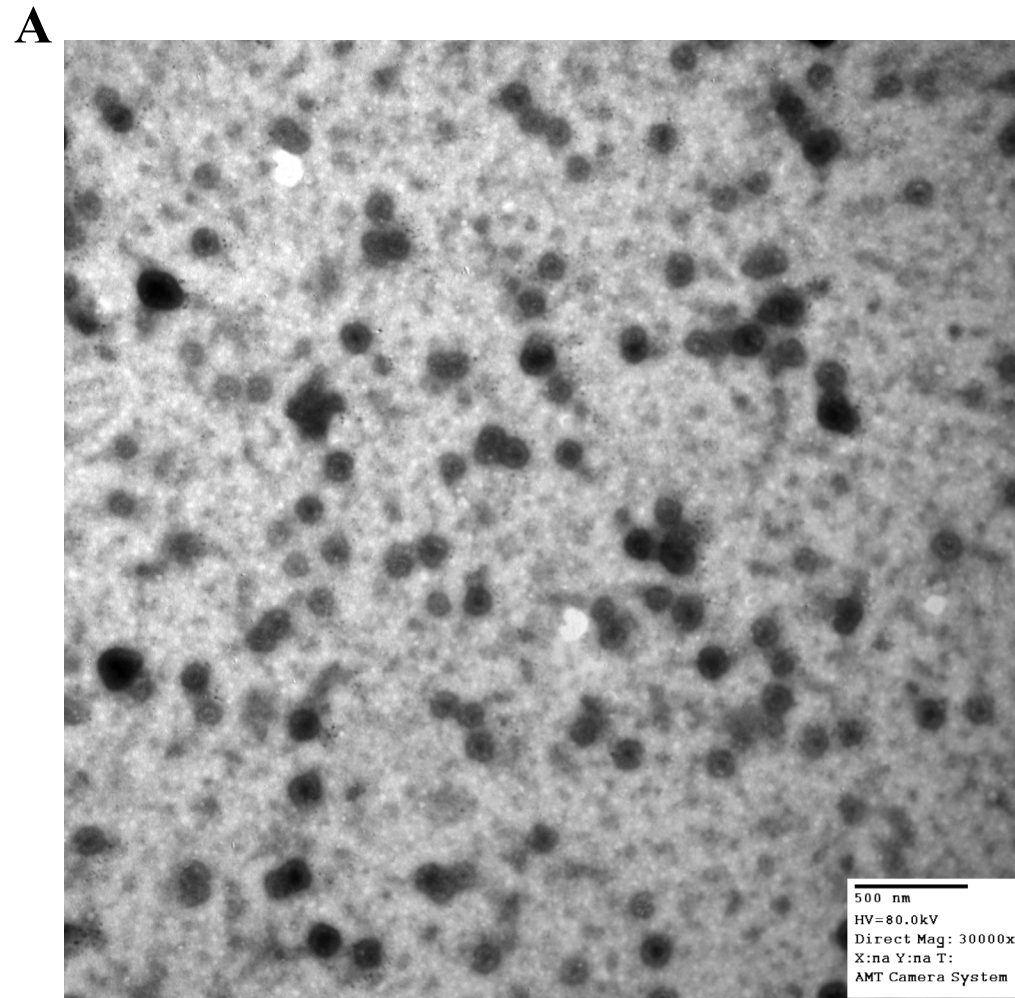

**B**

Peak Analysis (Number Absolute)

| Diameter / nm | Number Absolute | FWHM / nm | Percentage |
|---------------|-----------------|-----------|------------|
| 104.8         | 88.9            | 70.1      | 93.6       |
| 55.5          | 14.4            | 12.8      | 3.5        |
| 35.1          | 5.4             | 4.4       | 3.0        |

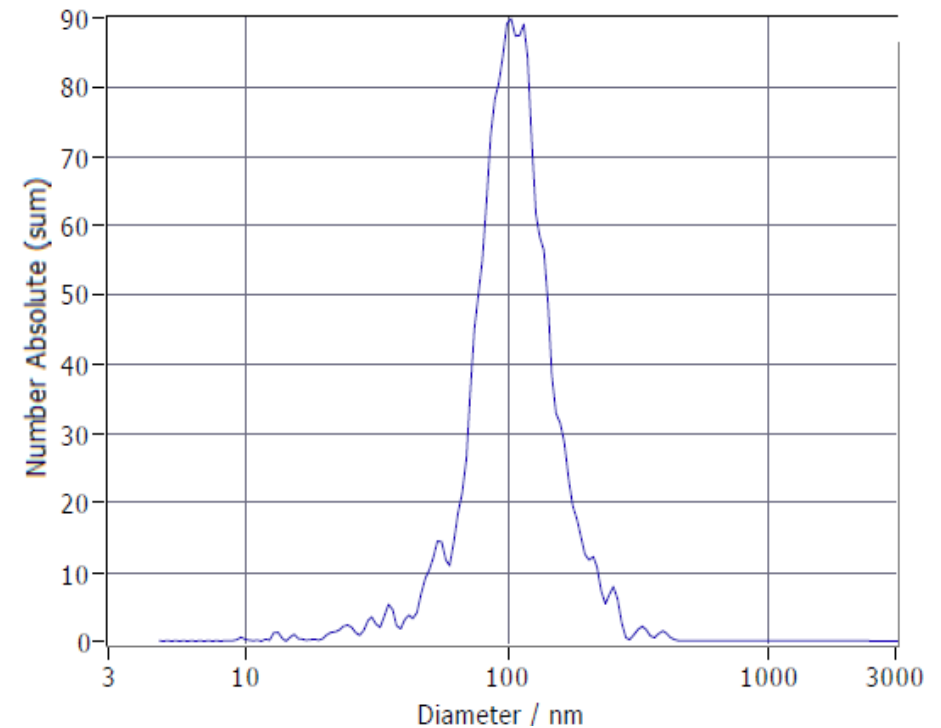

Exosome Characterization. (A) Serum exosome observation by electron microscopy and  $\times 3000$  magnification. (B) Serum exosome validation by nanoparticle tracking device—ZetaView. Note that the particles peak around at 100 nm.
