# Supplementary material for: Identification of serum exosomal metabolomic and proteomic profiles for remote ischemic preconditioning
Source: J Transl Med. 2023 Apr 3;21:241. doi: 10.1186/s12967-023-04070-1 (PMC10069038; doi:10.1186/s12967-023-04070-1)
Supplement: Supplementary file 2 — Additional file 2. Supplementary Table 1 Expression levels of exosomemetabolites in the two down regulated modules (red, yellow); Supplementary Table 2. Top 20 Metascape enrichment pathway for DE proteins; Supplementary Table 3. Top 20 KEGG pathway for DE metabolites; Supplementary Table 4. KEGG pathway for DE metabolite-gene interaction analysis [file 12967_2023_4070_MOESM2_ESM.xlsx]

## Sheet: red and yellow module
supplementary Table 1. Expression levels of exosome-metabolites in the two down regulated modules (red, yellow)
										Control																													Ischemia
Index	Module	Formula	Compounds	物质	Class I	物质一级分类	Class II	物质二级分类	M61	M62	M63	M64	M65	M66	M67	M68	M69	M70	M71	M72	M73	M74	M75	M76	M77	M78	M79	M80	M81	M82	M83	M84	M85	M86	M87	M88	M89	M90	M31	M32	M33	M34	M35	M36	M37	M38	M39	M40	M41
MEDN0375	red	C18H30O3	13-HOTrE	13S-羟基-9Z,11E,15Z-十八碳三烯酸	FA	脂肪酰类	Oxidized lipids	氧化脂质	118900	54654	43288	104930	63748	29870	50196	70921	56545	22355	20156	7149.3	11613	10677	3083.1	5241.6	11115	31404	6502.3	5069.8	8810.2	33268	60567	102330	29259	42313	25721	57671	37146	30954	245030	50595	35632	31433	44728	3810.9	31830	21446	37149	31782	34929
MEDN1035	red	C18H32O3	13(R)-HODE	13R-羟基-9Z,11E-十八碳二烯酸	FA	脂肪酰类	Oxidized lipids	氧化脂质	1007700	408570	668320	1762300	791030	271620	500980	411410	519880	258840	87921	51701	152530	146820	47392	47129	56557	109240	48362	39858	235450	278170	288060	704180	360440	321330	339070	689060	356020	322600	2007500	377720	389630	466000	522120	75421	322050	243820	301340	294610	202570
MEDN1415	red	C18H30O3	13(S)-HOTrE(γ)	13-羟基-9Z,11E,15Z-十八碳三烯酸	FA	脂肪酰类	Oxidized lipids	氧化脂质	118900	54654	43288	104930	63748	29870	50196	70921	56545	22355	20156	7149.3	11613	10677	3083.1	5241.6	11115	31404	6502.3	5069.8	8810.2	33268	60567	102330	29259	42313	25721	57671	37146	30954	245030	50595	35632	31433	44728	3810.9	31830	21446	37149	31782	34929
MEDN1562	red	C12H14O4	Monobutyl phthalate	邻苯二甲酸单丁酯	Aldehyde,Ketones,Esters	醛、酮、酯类	Esters	酯类	107070	86020	116350	117930	96023	96083	138060	107490	119250	127080	90468	88643	81181	93837	80423	94967	108710	93367	89878	108900	112500	99708	106350	120550	97363	113890	117100	123220	115090	118420	119940	76995	109660	109960	112410	109380	137250	117350	110000	113620	104850
MEDN1787	red	C15H10O5	7,8-Dihydroxy-3-(4-hydroxyphenyl)benzopyran-4-one	7,8-二羟基-3-(4-羟基苯基)苯并吡喃-4-酮	Benzene and substituted derivatives	苯及其衍生物	Benzene and substituted derivatives	苯及其衍生物	33213	31051	38301	38174	24285	26340	31163	27979	20033	37324	38578	40697	32848	50675	38404	44677	44900	48843	32010	35449	38546	34929	31752	30666	20804	43150	38572	38912	37652	33000	51861	20181	35278	39578	22441	41066	35868	34378	24462	32623	32412
MEDP2270	red	C10H5Cl2NO3	CAY-10577	CAY-10577	Benzene and substituted derivatives	苯及其衍生物	Benzene and substituted derivatives	苯及其衍生物	144600	136440	142490	121790	137740	125360	151880	113930	138070	129680	145380	108570	125950	164750	129830	119220	128640	142820	137020	99556	117130	110870	131050	138070	190880	152880	126800	143850	134420	117160	150040	119610	137010	164600	171600	112180	151760	112590	137980	128020	115520
MEDN0350	red	C20H32O3	(±)15-HETE	(±)15-羟基-5Z,8Z,11Z,13E-二十碳四烯酸	FA	脂肪酰类	Oxidized lipids	氧化脂质	51844	38630	77973	161340	34736	27647	67255	35882	74438	38713	3168.9	2416.9	13445	10037	1313.8	1536.8	4426.7	2171.2	3513	2431.4	19507	32959	32423	98683	23119	45847	57292	81281	30533	31954	100650	63712	64383	67571	48879	9946.8	42025	29528	28256	56784	16448
MEDN0768	red	C18H30O3	13-oxoODE	13-氧代-9Z,11E-十八碳二烯酸	FA	脂肪酰类	Oxidized lipids	氧化脂质	211570	54697	130300	188800	128610	55989	75894	58161	73927	42217	17171	18291	31868	21199	11585	8612.9	13760	16526	9328.4	11354	31586	29013	47264	130580	65260	55917	58071	125700	57440	76124	308190	89984	72445	95502	128390	20110	60810	50291	105310	53323	45383
MEDN0784	red	C18H30O3	9-oxoODE	9-氧代-10E,12Z-十八碳二烯酸	FA	脂肪酰类	Oxidized lipids	氧化脂质	211570	54697	130300	188800	128610	55989	75894	58161	73927	42217	17171	18291	31868	21199	11585	8612.9	13760	16526	9328.4	11354	31586	29013	47264	130580	65260	55917	58071	125700	57440	76124	308190	89984	72445	95502	128390	20110	60810	50291	105310	53323	45383
MEDN1426	red	C18H34O5	9(S),12(S),13(S)-TriHOME	9,12,13-三羟基-十八碳单烯酸	FA	脂肪酰类	Oxidized lipids	氧化脂质	47955	24910	32441	59641	46175	20685	31503	25234	28554	9909.8	13486	3138.9	12604	11996	10826	7308.7	11369	11069	7771.6	7807.7	20700	14164	27502	42938	18645	21937	15892	35518	32882	29980	84188	14185	24766	28122	33882	10797	21476	9292.1	55874	20368	10502
MADP0119	red	C4H9NO2S	Methylcysteine	S-甲基-L-半胱氨酸	Amino acid and Its metabolomics	氨基酸及其代谢物	Amino acids	氨基酸	50687	115600	84187	140660	161520	69374	86557	92361	86875	82769	72443	88811	54008	83954	178550	59340	39863	71935	77904	37421	83286	57122	61749	105510	49556	49975	108770	133280	75067	55601	134110	160820	93893	89550	110920	85873	62063	68199	375320	68694	51692
MEDN0348	yellow	C20H34O6	TXB2	血栓素B2	FA	脂肪酰类	Oxidized lipids	氧化脂质	6938.5	34392	1601.5	32310	40492	19825	6734.5	52360	14680	10659	25238	15363	20378	11108	15786	33022	14225	41440	43310	9853.2	50711	23982	30002	13668	36135	11745	38351	52952	4616.1	8481.7	13838	7674.2	3358.1	7618.5	9603.5	6148.5	22777	26921	6610.9	33583	5245
MEDN0602	yellow	C10H14N5O7P	Deoxyguanosine 5'-monophosphate(dGMP)	2-'脱氧鸟苷5'-一磷酸(dGMP)	Nucleotide And Its metabolomics	核苷酸及其代谢物	Nucleotide and Its metabolomics	核苷酸及其代谢物	31743	38417	11651	40143	51354	31762	23013	41642	21339	21227	50157	16344	29312	24194	29840	77227	71383	49359	39757	40696	54025	28600	41401	58872	33719	30717	39447	47574	17897	14668	38259	19828	13444	19484	20183	32831	33804	30351	15810	66228	18992
MADP0435	yellow	C44H82NO7P	PC(18:2(9Z,12Z)/P-18:1(11Z))	PC(18:2(9Z,12Z)/P-18:1(11Z))	GP	甘油磷脂类	PC	磷脂酰胆碱	1576200	1196000	621800	797680	1733300	1442100	672080	1284400	1334100	1519500	2366800	1970800	1845100	1471300	1246800	3615600	3682800	1533300	1916200	971520	1475800	829910	2729800	2294500	1311200	439460	1472000	4053800	1806300	2152200	1157400	576600	234200	1266200	935720	1902300	4126200	1754100	954010	3360600	1376200
MADP0462	yellow	C43H76NO7P	PE(20:4(5Z,8Z,11Z,14Z)/P-18:1(11Z))	PE(20:4(5Z,8Z,11Z,14Z)/P-18:1(11Z))	GP	甘油磷脂类	PE	磷脂酰乙醇胺	427940	414310	237890	439890	626520	470450	285230	526960	262850	350810	732630	369160	334190	481440	426650	964420	862360	489800	675630	406120	401750	222460	759410	1122100	373990	467360	395080	642660	444130	512900	500570	193760	449780	445650	242110	643290	1088100	625740	449290	788690	429060
MEDN0752	yellow	C20H30O3	(±)15-HEPE	(±)-15-羟基-5Z,8Z,11Z,13E,17Z-二十碳五烯酸	FA	脂肪酰类	Oxidized lipids	氧化脂质	1988.6	1096.1	897.49	5457.4	8827.1	1265.3	788.96	1598.5	1071.5	3414.1	14443	5444.5	5766.3	6441.9	906.49	10527	10992	12227	10853	6609.1	7703.2	5591.5	6884.5	30384	9663.8	3029.7	4198.9	13554	1268.6	2727.2	5540.6	543.16	1426.3	1984.2	1080.2	3039.2	8421.7	2148.4	2332.2	15924	2321.2
MEDN0756	yellow	C20H30O3	(±)18-HEPE	(±)-18-羟基-5Z,8Z,11Z,14Z,16E-二十碳五烯酸	FA	脂肪酰类	Oxidized lipids	氧化脂质	1988.6	1096.1	897.49	5457.4	8827.1	1265.3	788.96	1598.5	1071.5	3414.1	14443	5444.5	5766.3	6441.9	906.49	10527	10992	12227	10853	6609.1	7703.2	5591.5	6884.5	30384	9663.8	3029.7	4198.9	13554	1268.6	2727.2	5540.6	543.16	1426.3	1984.2	1080.2	3039.2	8421.7	2148.4	2332.2	15924	2321.2
MEDN1264	yellow	C27H48NO7P	LPE(0:0/22:4)	LPE(0:0/22:4)	GP	甘油磷脂类	LPE	溶血磷脂酰乙醇胺	19465	16579	8357	23120	34019	21378	19439	13200	15795	12942	32971	21489	13311	23354	16740	29027	65426	23379	31132	16938	22244	12100	28783	295590	16280	19230	33058	35592	9138	15188	10292	12033	5755	10514	18955	12847	14351	21547	7424	43653	5735.8
MEDN1265	yellow	C27H48NO7P	LPE(22:4/0:0)	LPE(22:4/0:0)	GP	甘油磷脂类	LPE	溶血磷脂酰乙醇胺	19465	16579	8357	23120	34019	21378	19439	13200	15795	12942	32971	21489	13311	23354	16740	29027	65426	23379	31132	16938	22244	12100	28783	295590	16280	19230	33058	35592	9138	15188	10292	12033	5755	10514	18955	12847	14351	21547	7424	43653	5735.8
MEDN1276	yellow	C25H44NO7P	LPE(20:4/0:0)	LPE(20:4/0:0)	GP	甘油磷脂类	LPE	溶血磷脂酰乙醇胺	42210	31410	15781	55253	71052	54570	52702	43454	29872	49139	68292	49349	50767	62330	38568	109760	191490	63778	59700	58414	55343	32953	95266	405180	46070	48293	52207	98238	39667	61874	55852	45567	30791	53655	38460	54210	96015	54611	35282	102830	44091
MEDN1485	yellow	C25H44NO7P	Glycerophospho-N-Arachidonoyl Ethanolamine	甘油磷酸-N-花生四烯酸乙醇胺	GP	甘油磷脂类	LPE	溶血磷脂酰乙醇胺	202120	171570	82402	261320	327170	271210	286550	205200	152160	217300	343470	283160	249230	278320	176840	542420	1038900	332850	267100	239540	266260	123420	408110	2313200	229920	231590	258520	477390	160700	269450	202490	186560	142350	246100	141730	318030	459880	278660	188640	460900	199460
MEDP1690	yellow	C28H58NO7P	LPC(20:0/0:0)	LPC(20:0/0:0)	GP	甘油磷脂类	LPC	溶血磷脂酰胆碱	45295	58944	46297	53673	54702	51085	54191	55561	61401	39585	68652	48386	58795	53651	60935	74701	73605	63159	60075	60950	55792	46524	68190	49678	55717	55304	55070	63607	47429	52206	57124	62939	48038	56361	68394	64478	59849	57621	42167	73506	59326
MEDP1691	yellow	C25H52NO7P	LPC(0:0/17:0)	LPC(0:0/17:0)	GP	甘油磷脂类	LPC	溶血磷脂酰胆碱	248100000	266310000	263030000	261390000	264150000	257970000	260550000	261590000	262190000	254330000	268900000	260690000	258200000	261960000	258240000	257840000	261690000	265890000	273630000	266180000	257240000	254930000	270710000	251430000	262040000	261920000	265490000	265130000	238250000	237700000	256230000	255720000	253170000	253590000	245590000	252840000	259830000	255500000	252620000	257000000	246690000
MADN0073	yellow	C2H7NO3S	2-Aminoethanesulfonic Acid	2-氨基乙烷磺酸/牛磺酸	Organic acid And Its derivatives	有机酸及其衍生物	Sulfonic acids	磺酸类化合物	83826	54784	10982	55517	68005	58277	39354	59882	50649	26773	89540	54657	45595	46809	48055	128660	59666	98751	48788	70422	45369	36308	43976	68756	69180	47276	45522	28006	25222	66005	44148	53266	33895	30761	57385	41212	39015	39459	42617	107590	45931
MEDP1077	yellow	C11H15N5O4	2'-O-methyladenosine	2'-O-甲基腺苷	Nucleotide And Its metabolomics	核苷酸及其代谢物	Nucleotide and Its metabolomics	核苷酸及其代谢物	175710	314390	23984	223580	402900	227010	108030	131230	123460	96948	265140	34795	153980	161330	269670	514590	526310	344640	383550	258200	317790	163450	276890	286070	186480	157500	181440	356790	60597	54339	135860	52565	68658	97693	72921	188680	267960	156910	30729	489120	81912
MEDN0751	yellow	C20H32O3	(±)12-HETE	(±)12-羟基-5Z,8Z,10E,14Z-二十碳四烯酸	FA	脂肪酰类	Oxidized lipids	氧化脂质	34523	22401	6699.9	59068	86404	30985	31236	37813	20289	19733	83916	44075	38457	37418	24417	89178	52826	122210	78012	56145	95634	11559	55940	78665	50679	20237	28989	47804	6303.7	14168	57903	20378	6501	15912	22470	44588	65498	32702	12587	109480	10736
[truncated: 22 more columns]

## Sheet: Top 20 proteins pathway
supplementary Table 2. Top 20 Metascape enrichment pathway for DE proteins
GO	Category	CategoryID	Description	PARENT_GO	LogP	Enrichment	Z-score	#TotalGeneInLibrary	#GeneInGO	#GeneInHitList	#GeneInGOAndHitList	%InGO	STDV %InGO	GeneID	Hits	Log(q-value)	GROUP_ID	BestLogPInGroup	BestEnrichmentInGroup
R-HSA-114608	Reactome Gene Sets	6	Platelet degranulation		-19.0112	44.8946	24.5938	30198	129	73	14	19.1781	4.60793	1|335|351|710|1191|3273|3309|3699|3700|3827|5265|5341|6403|7057	A1BG|APOA1|APP|SERPING1|CLU|HRG|HSPA5|ITIH3|ITIH4|KNG1|SERPINA1|PLEK|SELP|THBS1	-14.7247	1	-19.0112	44.8946
hsa04610	KEGG Pathway	24	Complement and coagulation cascades		-14.0125	48.6672	21.6637	30198	85	73	10	13.6986	4.02426	462|710|727|730|731|1191|2147|3426|3827|5265	SERPINC1|SERPING1|C5|C7|C8A|CLU|F2|CFI|KNG1|SERPINA1	-10.3634	2	-14.0125	206.836
R-HSA-381426	Reactome Gene Sets	6	Regulation of Insulin-like Growth Factor (IGF) transport and uptake by Insulin-like Growth Factor Binding Proteins (IGFBPs)		-12.2921	33.0937	17.6997	30198	125	73	10	13.6986	4.02426	335|348|351|462|1356|2147|3827|5265|5589|8542	APOA1|APOE|APP|SERPINC1|CP|F2|KNG1|SERPINA1|PRKCSH|APOL1	-8.72218	3	-12.2921	95.4626
WP5115	WikiPathways	27	Network map of SARS-CoV-2 signaling pathway		-9.8259	18.7182	13.0137	30198	221	73	10	13.6986	4.02426	183|335|731|3273|3312|3426|3699|3700|6403|8542	AGT|APOA1|C8A|HRG|HSPA8|CFI|ITIH3|ITIH4|SELP|APOL1	-6.82025	4	-9.8259	18.7182
GO:0030193	GO Biological Processes	19	regulation of blood coagulation	19_GO:0032501 multicellular organismal process	-9.46367	41.9666	16.7704	30198	69	73	7	9.58904	3.44617	348|462|710|2147|3273|3827|7057	APOE|SERPINC1|SERPING1|F2|HRG|KNG1|THBS1	-6.53058	5	-9.46367	137.89
R-HSA-6798695	Reactome Gene Sets	6	Neutrophil degranulation		-8.74052	10.2989	10.1307	30198	482	73	12	16.4384	4.33782	1|820|2950|3312|4860|5265|7276|8773|10549|10576|28988|51411	A1BG|CAMP|GSTP1|HSPA8|PNP|SERPINA1|TTR|SNAP23|PRDX4|CCT2|DBNL|BIN2	-5.88381	6	-8.74052	10.2989
GO:1902903	GO Biological Processes	19	regulation of supramolecular fiber organization	19_GO:0050789 regulation of biological process	-8.70457	11.9433	10.5817	30198	381	73	11	15.0685	4.18705	335|348|351|832|1191|1627|3312|5341|7168|28984|28988	APOA1|APOE|APP|CAPZB|CLU|DBN1|HSPA8|PLEK|TPM1|RGCC|DBNL	-5.86165	7	-8.70457	27.126
GO:0010873	GO Biological Processes	19	positive regulation of cholesterol esterification	19_GO:0048518 positive regulation of biological process	-8.40642	183.854	27.0073	30198	9	73	4	5.47945	2.66361	183|335|337|348	AGT|APOA1|APOA4|APOE	-5.58983	8	-8.40642	183.854
GO:0061077	GO Biological Processes	19	chaperone-mediated protein folding	19_GO:0009987 cellular process	-7.76462	35.9714	14.3161	30198	69	73	6	8.21918	3.21461	1191|3309|3312|3336|7203|10576	CLU|HSPA5|HSPA8|HSPE1|CCT3|CCT2	-4.98475	9	-7.76462	44.7212
GO:1905908	GO Biological Processes	19	positive regulation of amyloid fibril formation	19_GO:0048518 positive regulation of biological process	-7.26667	310.253	30.4484	30198	4	73	3	4.10959	2.32341	348|351|1191	APOE|APP|CLU	-4.53139	10	-7.26667	310.253
P00037	PANTHER Pathway	28	Ionotropic glutamate receptor pathway		-6.56921	206.836	24.8216	30198	6	73	3	4.10959	2.32341	183|462|5265	AGT|SERPINC1|SERPINA1	-3.99929	11	-6.56921	206.836
GO:0006897	GO Biological Processes	19	endocytosis	19_GO:0051179 localization	-6.47682	8.30665	8.09347	30198	498	73	10	13.6986	4.02426	348|351|1211|1212|3426|3495|7057|28448|28988|51411	APOE|APP|CLTA|CLTB|CFI|IGHD|THBS1|IGHV3-15|DBNL|BIN2	-3.92114	12	-6.47682	14.5148
R-HSA-5653656	Reactome Gene Sets	6	Vesicle-mediated transport		-6.19997	6.76134	7.44074	30198	673	73	11	15.0685	4.18705	335|348|351|832|1211|1212|3263|3312|5265|8542|8773	APOA1|APOE|APP|CAPZB|CLTA|CLTB|HPX|HSPA8|SERPINA1|APOL1|SNAP23	-3.67144	13	-6.19997	47.2767
GO:0010594	GO Biological Processes	19	regulation of endothelial cell migration	19_GO:0040011 locomotion	-5.84086	12.59	8.68556	30198	230	73	7	9.58904	3.44617	183|348|498|506|3273|7057|28984	AGT|APOE|ATP5F1A|ATP5F1B|HRG|THBS1|RGCC	-3.4066	14	-5.84086	21.7722
R-HSA-445355	Reactome Gene Sets	6	Smooth Muscle Contraction		-5.5705	41.3671	12.5758	30198	40	73	4	5.47945	2.66361	800|7168|7170|7171	CALD1|TPM1|TPM3|TPM4	-3.20891	15	-5.5705	41.3671
WP2864	WikiPathways	27	Apoptosis-related network due to altered Notch3 in ovarian cancer		-5.04247	30.6423	10.7322	30198	54	73	4	5.47945	2.66361	348|351|3309|7057	APOE|APP|HSPA5|THBS1	-2.78782	16	-5.04247	30.6423
GO:0048168	GO Biological Processes	19	regulation of neuronal synaptic plasticity	19_GO:0023052 signaling	-4.97908	29.5479	10.526	30198	56	73	4	5.47945	2.66361	183|348|351|1627	AGT|APOE|APP|DBN1	-2.73822	17	-4.97908	34.4726
GO:0019725	GO Biological Processes	19	cellular homeostasis	19_GO:0065007 biological regulation	-4.72866	5.99524	6.19162	30198	621	73	9	12.3288	3.84793	183|348|351|506|1356|2147|2936|3263|10549	AGT|APOE|APP|ATP5F1B|CP|F2|GSR|HPX|PRDX4	-2.5236	18	-4.72866	23.4154
GO:2000379	GO Biological Processes	19	positive regulation of reactive oxygen species metabolic process	19_GO:0048518 positive regulation of biological process	-4.56847	23.3054	9.26278	30198	71	73	4	5.47945	2.66361	183|2147|2950|7057	AGT|F2|GSTP1|THBS1	-2.39066	19	-4.56847	42.7936
GO:0031529	GO Biological Processes	19	ruffle organization	19_GO:0009987 cellular process	-4.47037	47.7313	11.7347	30198	26	73	3	4.10959	2.32341	5341|7168|28988	PLEK|TPM1|DBNL	-2.30699	20	-4.47037	47.7313

## Sheet: Top 20 metabolites pathway
supplementary Table 3. Top 20 KEGG pathway for DE metabolites
Kegg_level_1	Kegg_pathway	ko_id	Genome_frequency	P_value	DA_score	Up_num	Down_num
Metabolism	Fatty acid biosynthesis	ko00061	3 out of 144 2.08333333333333%	0.0609877	-0.666667	0	2
Metabolism	Primary bile acid biosynthesis	ko00120	3 out of 144 2.08333333333333%	0.0609877	0	1	1
Metabolism	Tyrosine metabolism	ko00350	7 out of 144 4.86111111111111%	0.0723302	-0.142857	1	2
Metabolism	Lysine degradation	ko00310	7 out of 144 4.86111111111111%	0.0723302	-0.428571	0	3
Organismal Systems	Cholesterol metabolism	ko04979	1 out of 144 0.694444444444444%	0.152778	1	1	0
Metabolism	Oxidative phosphorylation	ko00190	1 out of 144 0.694444444444444%	0.152778	-1	0	1
Human Diseases	Pathways of neurodegeneration - multiple diseases	ko05022	1 out of 144 0.694444444444444%	0.152778	1	1	0
Cellular Processes	Apoptosis	ko04210	1 out of 144 0.694444444444444%	0.152778	1	1	0
Metabolism	Sphingolipid metabolism	ko00600	5 out of 144 3.47222222222222%	0.167327	0.4	2	0
Organismal Systems	Bile secretion	ko04976	11 out of 144 7.63888888888889%	0.224229	-0.0909091	1	2
Human Diseases	Chemical carcinogenesis - receptor activation	ko05207	2 out of 144 1.38888888888889%	0.28312	0.5	1	0
Organismal Systems	Serotonergic synapse	ko04726	2 out of 144 1.38888888888889%	0.28312	-0.5	0	1
Metabolism	Fatty acid degradation	ko00071	2 out of 144 1.38888888888889%	0.28312	-0.5	0	1
Human Diseases	Parkinson disease	ko05012	2 out of 144 1.38888888888889%	0.28312	0.5	1	0
Metabolism	Metabolic pathways	ko01100	109 out of 144 75.6944444444444%	0.333888	-0.0183486	8	10
Metabolism	Taurine and hypotaurine metabolism	ko00430	3 out of 144 2.08333333333333%	0.394186	0.333333	1	0
Metabolism	Pyruvate metabolism	ko00620	3 out of 144 2.08333333333333%	0.394186	-0.333333	0	1
Metabolism	Citrate cycle (TCA cycle)	ko00020	3 out of 144 2.08333333333333%	0.394186	-0.333333	0	1
Organismal Systems	GABAergic synapse	ko04727	3 out of 144 2.08333333333333%	0.394186	-0.333333	0	1
Cellular Processes	Necroptosis	ko04217	3 out of 144 2.08333333333333%	0.394186	0.333333	1	0

## Sheet: Joint pathway
supplementary Table 4. KEGG pathway for DE metabolite-gene interaction analysis
Joint pathway	matched_features	Total	Expected	Hits	Raw p	Rich factor
Cholesterol metabolism	hsa:335; hsa:348; cpd:C05122	60	0.079309	3	6.11e-05	4.2139
Oxidative phosphorylation	hsa:498; hsa:506; cpd:C00042	149	0.19695	3	0.00089898	3.0462
Ferroptosis	hsa:1356; cpd:C21484	71	0.093849	2	0.0038448	2.4151
Nicotinate and nicotinamide metabolism	hsa:4860; cpd:C00042	92	0.12161	2	0.0063737	2.1956
Sphingolipid signaling pathway	cpd:C00319; hsa:3827	134	0.17712	2	0.013141	1.8814
Serotonergic synapse	cpd:C05963; hsa:351	157	0.20753	2	0.017746	1.7509
Porphyrin and chlorophyll metabolism	cpd:C05770; hsa:1356	184	0.24321	2	0.023902	1.6216
Purine metabolism	hsa:4860; cpd:C00362	225	0.29741	2	0.03468	1.4599
